# Supplementary material
Source: PubMed Central journal article supplement (PMC8343520)
Supplement: jamaophthalmol-e212742-s001.pdf [file jamaophthalmol-e212742-s001.pdf]

## Supplemental Online Content

Kheir WJ, Awwad ST, Bou Ghannam A, et al. Ophthalmic injuries after the Port of Beirut blast—one of largest nonnuclear explosions in history. *JAMA Ophthalmol*. Published online August 5, 2021. doi:10.1001/jamaophthalmol.2021.2742

**eFigure 1.** Ocular injuries that were encountered classified according to the Birmingham Eye Trauma Terminology System

**eFigure 2.** A, Anterior segment OCT 8 weeks after presentation demonstrating the epithelial ingrowth under the LASIK flap B, External slit lamp photograph of the same eye showing supero-temporal epithelial ingrowth C, Anterior segment OCT of the left eye of her sister, demonstrating a partial thickness corneal laceration that was secondarily sutured 2 weeks after presentation D, External slit lamp photograph of the left eye 8 weeks after presentation, demonstrating a central corneal scar

This supplemental material has been provided by the authors to give readers additional information about their work.

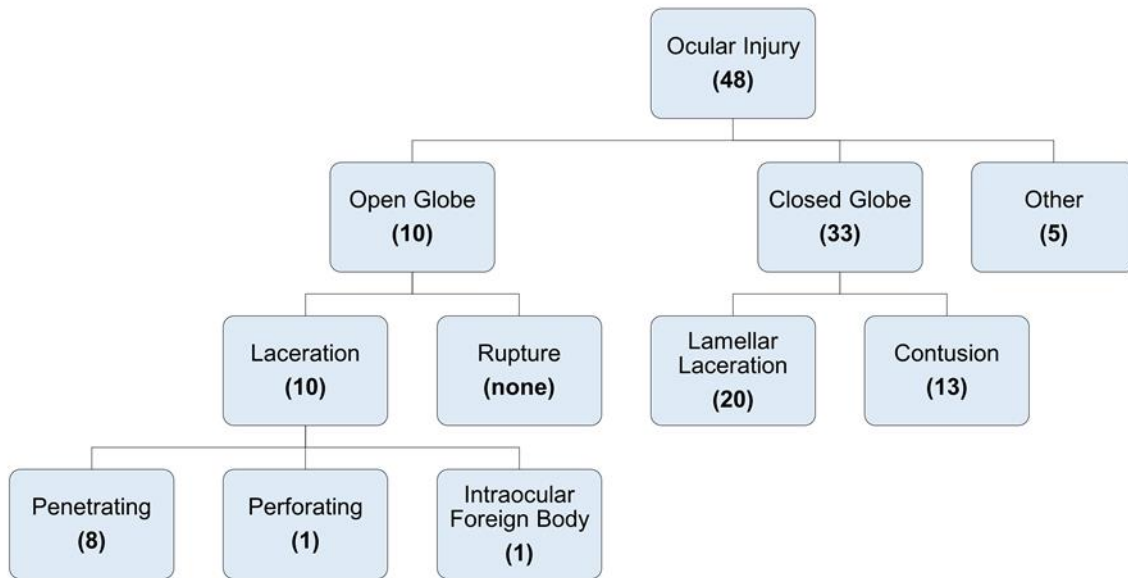

**eFigure 1.** Ocular injuries that were encountered classified according to the Birmingham Eye Trauma Terminology System.

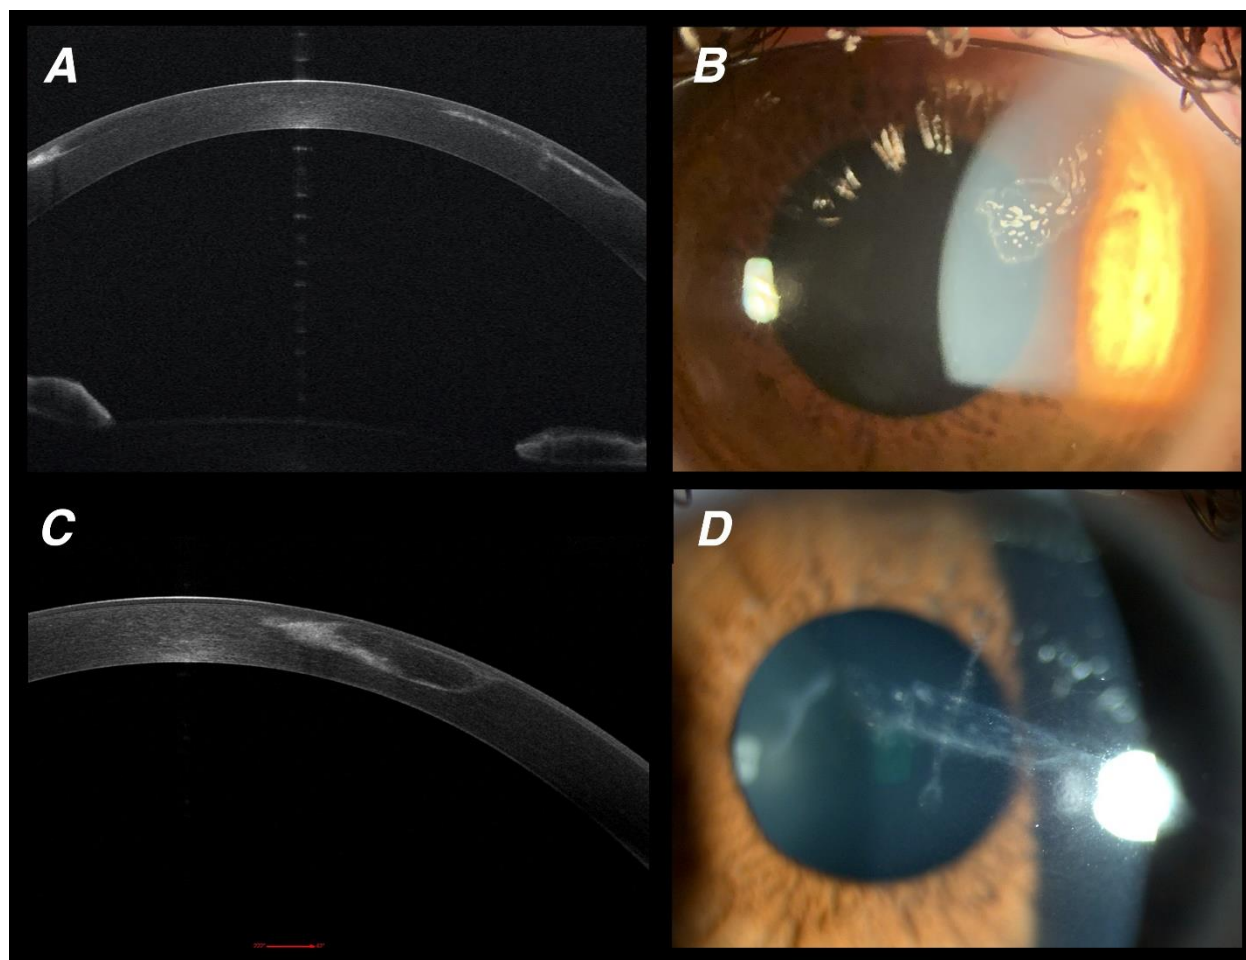

**eFigure 2.** **A**, Anterior segment OCT 8 weeks after presentation demonstrating the epithelial ingrowth under the LASIK flap **B**, External slit lamp photograph of the same eye showing supero-temporal epithelial ingrowth **C**, Anterior segment OCT of the left eye of her sister, demonstrating a partial thickness corneal laceration that was secondarily sutured 2 weeks after presentation **D**, External slit lamp photograph of the left eye 8 weeks after presentation, demonstrating a central corneal scar.
